# Supplementary material for: Nitrogen and sulfur-codoped porous carbon derived from a BSA/ionic liquid polymer complex: multifunctional electrode materials for water splitting and supercapacitors
Source: Royal Society of Chemistry journal article supplement (doi:10.1039/c8ra09700c), 2019-01-01
Supplement: c8ra09700c1.pdf [file c8ra09700c1.pdf]

## Supporting Information

### **Nitrogen and Sulfur-Codoped Porous Carbon Derived from BSA/Ionic Liquid Polymer Complex: Multifunctional Electrode Materials for Water Splitting and Supercapacitor**

Xiaojun Liu,<sup>a</sup> Junrui Yu,<sup>a</sup> Honghong Song,<sup>a</sup> Pengfei Song,<sup>a</sup> Rongming Wang,<sup>a</sup> and Yubing Xiong<sup>\*a,b</sup>

<sup>a</sup> Department of Chemistry, Zhejiang Sci-Tech University, Hangzhou 310018, Zhejiang Province,  
China

<sup>b</sup> Key Laboratory of Eco-Environment-Related Polymer Materials, Ministry of Education; College of  
Chemistry and Chemical Engineering, Northwest Normal University, Lanzhou 730070, China

<sup>c</sup> College of Chemistry, Nankai University, Tianjing 30071, P. R. China

#### **Experimental**

**Chemicals.** N-vinyl imidazole (Im, 98%, Sigma-Aldrich) was distilled under vacuum before use and stored in the refrigerator. Bromoacetonitrile, lithium bis(trifluoro methanesulfonyl)imide (LiTf<sub>2</sub>N, 99.95%) and bovine serum albumin (BSA, 98%) were purchased from Sigma-Aldrich and used as received. Azobisisobutyronitrile (AIBN, 98%, Tianjin Kaixin Chemical Company, China) was recrystallized from methanol before use and stored in the refrigerator. Carbon cloth (Toray TGP-H-060, Japan) was used for the substrate without any purification and pre-treatment. Nafion (Dupont D520, 5 wt % in ethanol) was purchased from Hesen Electrical Equipments Co., Ltd. (Shanghai, China). Platinum (20 wt% on carbon black, HiSPEC-3000) was brought from Alfa Aesar and used as received. All other reagents were commercially available and were used as received. Poly[1-cyanomethyl-3-vinylimidazolium bis(trifluoromethanesulfonyl)imide] (PIL-Tf<sub>2</sub>N) was prepared according to a previous report.<sup>[S1]</sup>

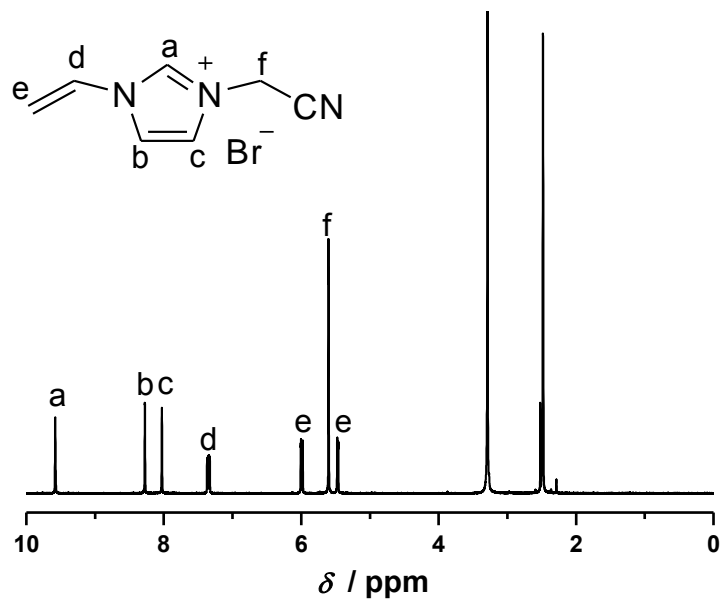

**Figure S1**  $^1\text{H}$  NMR spectrum (400 MHz) of 3-cyanomethyl-1-vinylimidazolium bromide (CMVIm-Br) in  $\text{DMSO-}d^6$  at 25 °C.

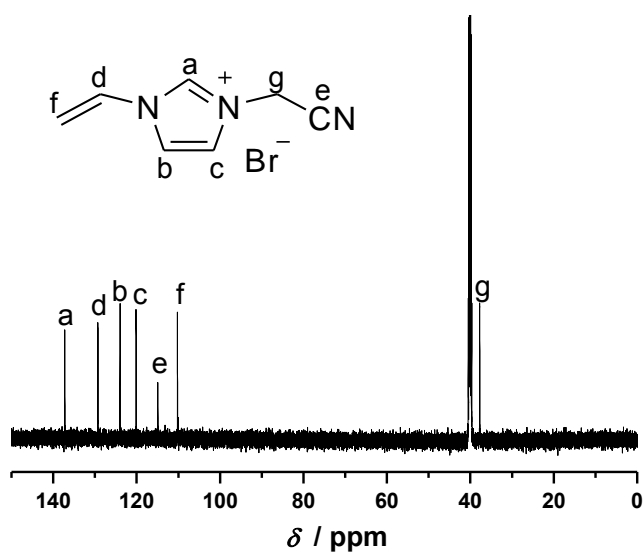

**Figure S2**  $^{13}\text{C}$  NMR spectrum (100 MHz) of 3-cyanomethyl-1-vinylimidazolium bromide (CMVIm-Br) in  $\text{DMSO-}d^6$  at 25 °C.

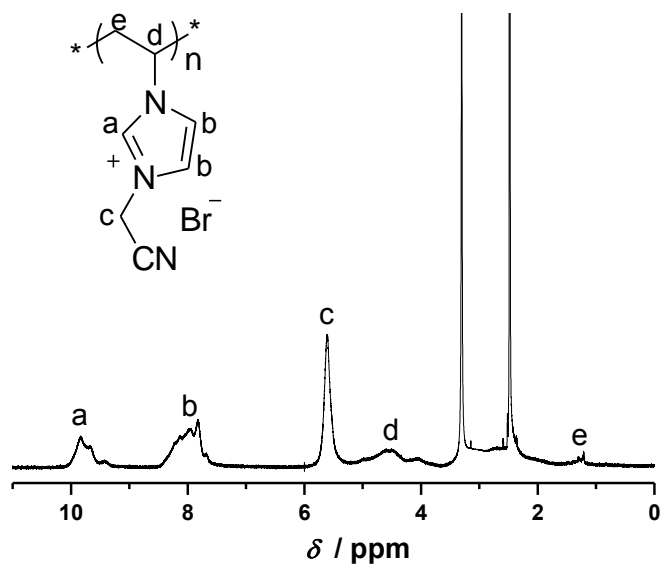

**Figure S3**  $^1\text{H}$  NMR spectrum (400 MHz) of poly(3-cyanomethyl-1-vinylimidazolium bromide) (PIL-Br) in DMSO- $d_6$  at 25 °C.

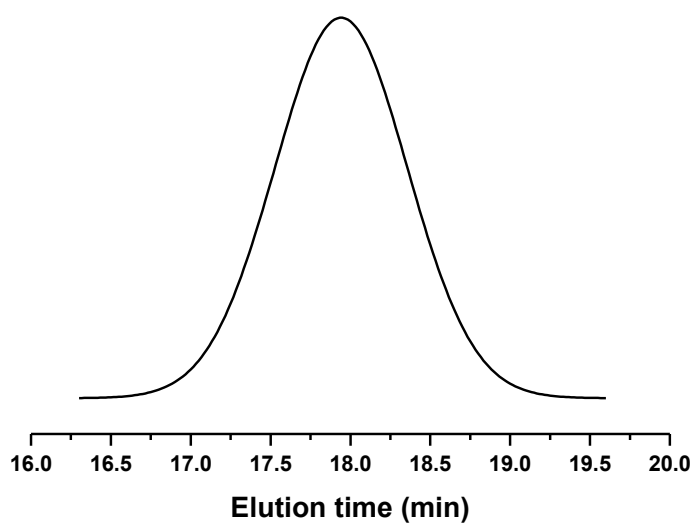

**Figure S4** GPC trace of poly(3-cyanomethyl-1-vinylimidazolium bromide).

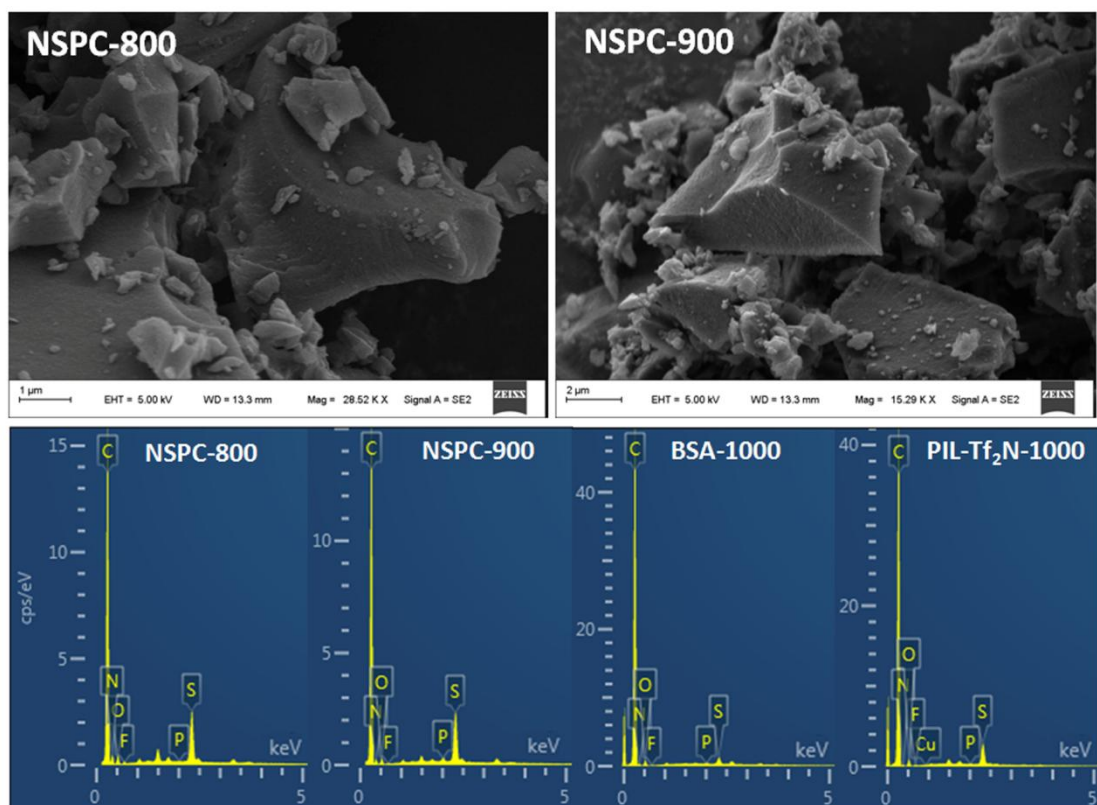

**Figure S5** SEM images of different carbon materials (a NSPC-800, b NSPC-900) and energy dispersive X-ray (EDX) spectra of BSA-1000, PIL-Tf<sub>2</sub>N-1000, NSPC-8000 and NSPC-900.

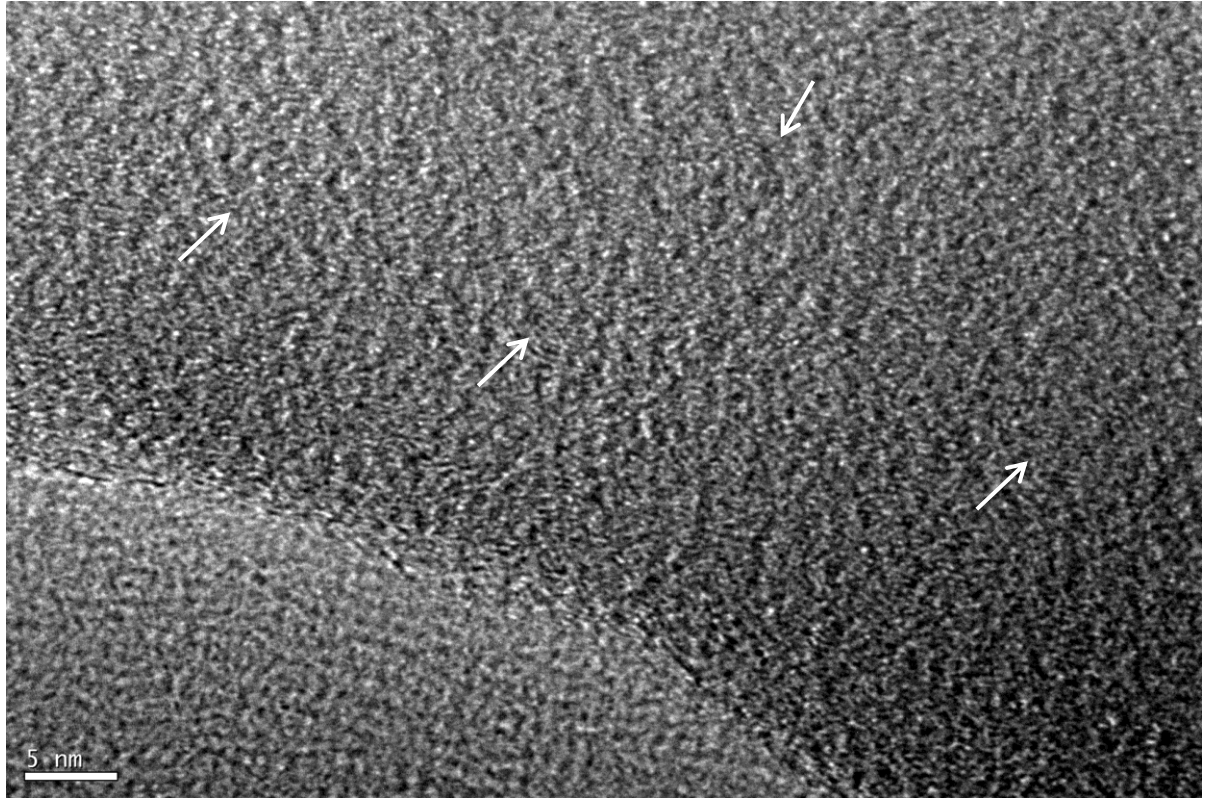

**Figure S6.** HRTEM image of NSPC-800. The white arrows point out the preferential orientation of the graphitic layers.

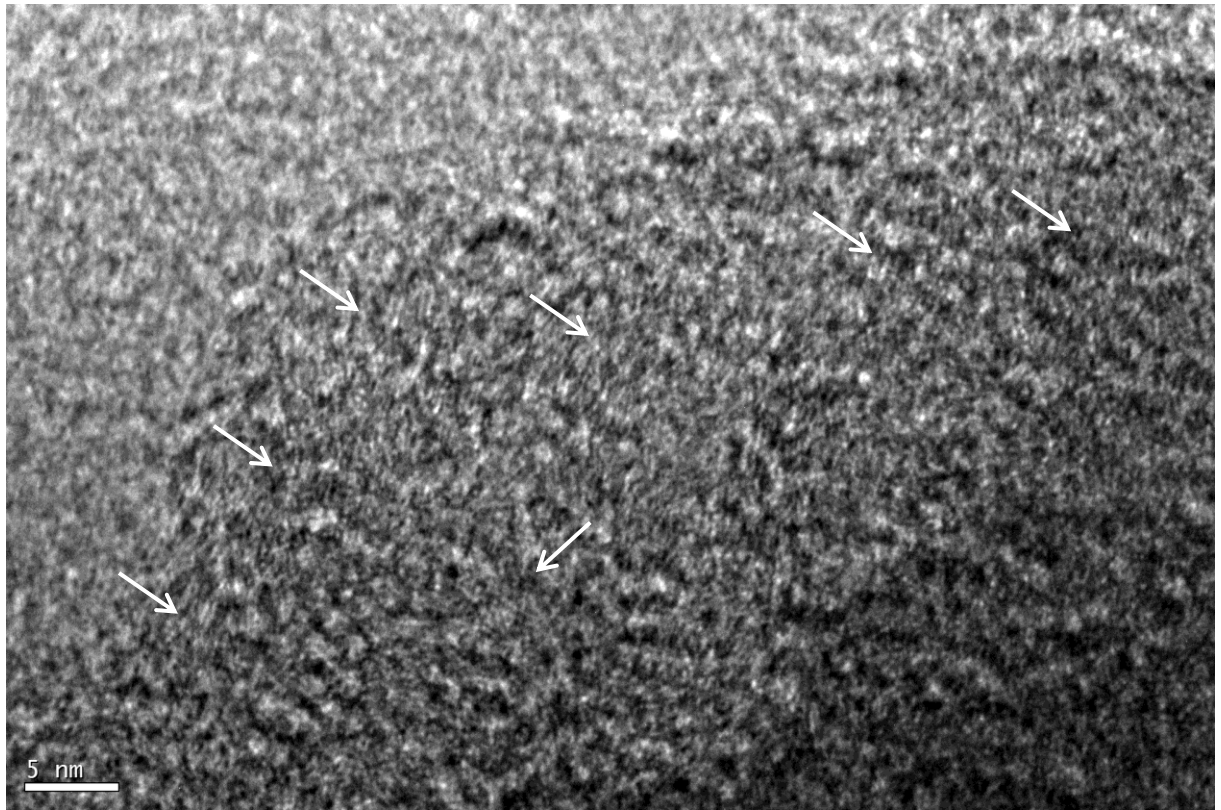

**Figure S7.** HRTEM image of NSPC-900. The white arrows point out the preferential orientation of the graphitic layers.

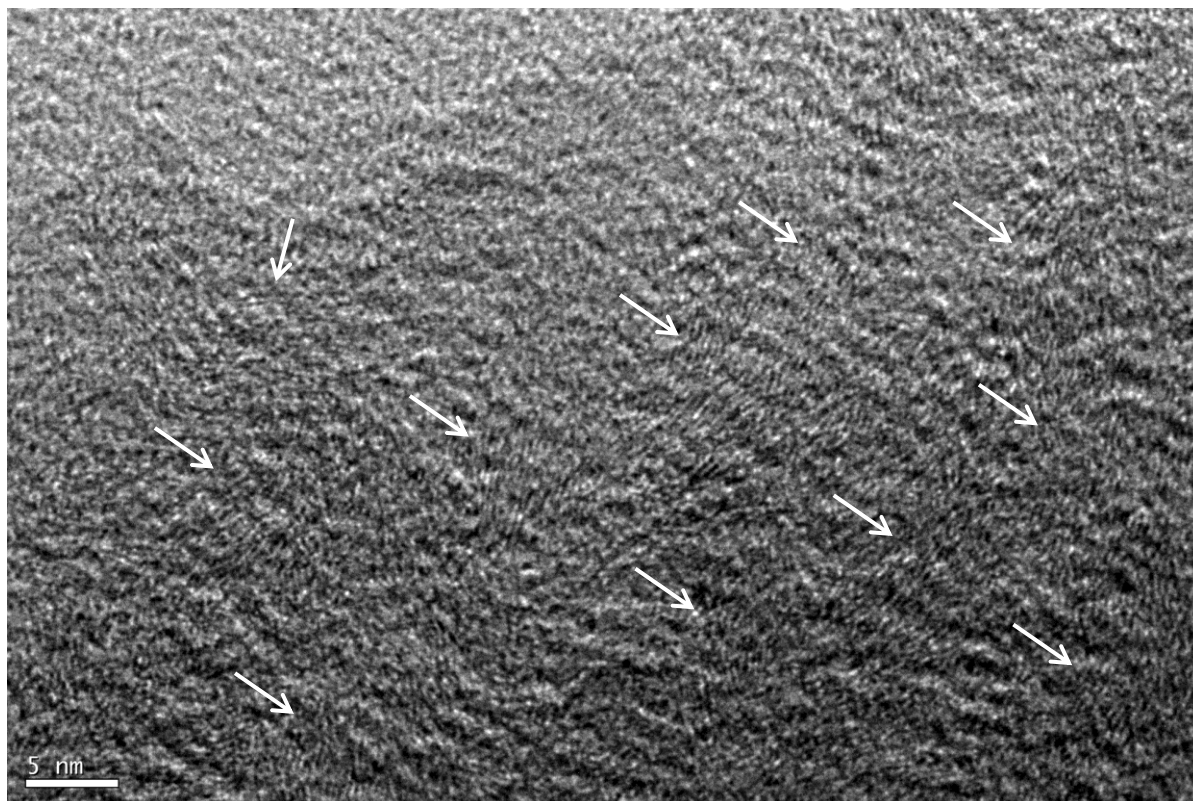

**Figure S8.** HRTEM image of NSPC-1000. The white arrows point out the preferential orientation of the graphitic layers.

**Table S1** Element contain in different carbon materials determined by elemental analysis.

| Sample                     | C      | N      | O      | S      |
|----------------------------|--------|--------|--------|--------|
| NSPC-800                   | 60.81% | 14.30% | 2.102% | 3.870% |
| NSPC-900                   | 68.84% | 9.11%  | 1.919% | 3.318% |
| NSPC-1000                  | 80.17% | 3.58%  | 1.651% | 2.009% |
| BSA-1000                   | 81.97% | 7.82%  | 0.792% | 1.12%  |
| PIL-Tf <sub>2</sub> N-1000 | 80.27% | 2.64%  | 1.592% | 1.878% |

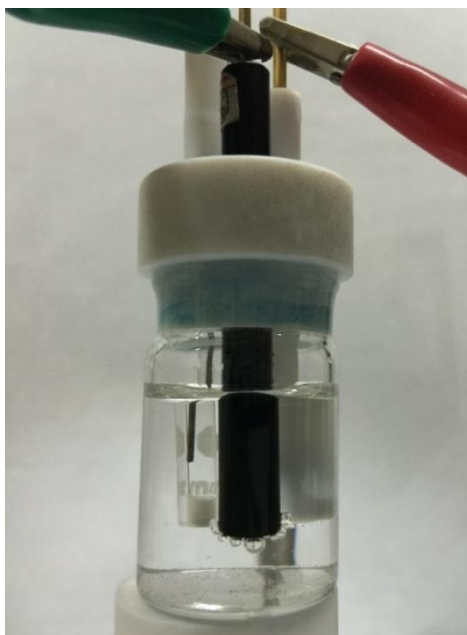

**Figure S9** Photograph of the setup for HER test in 0.5 M  $\text{H}_2\text{SO}_4$  showing the production of hydrogen bubbles on NSPC-1000-loaded glassy carbon electrode. The counter electrode and reference electrode are platinum wire electrode and saturated calomel electrode, respectively.

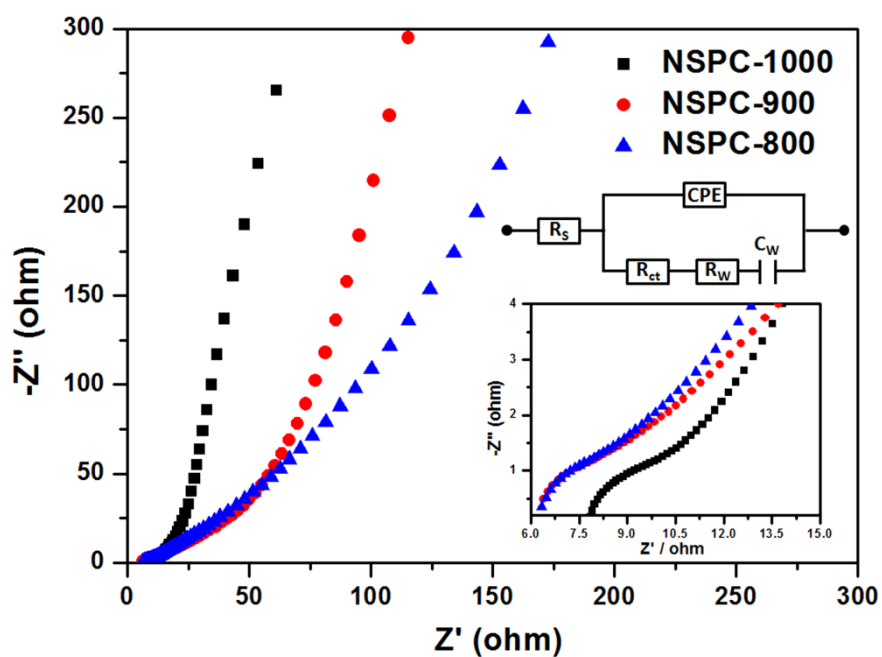

**Figure S10** Electrochemical impedance spectroscopy (EIS) data for NSPC materials in  $\text{H}_2\text{SO}_4$  (overpotential = 175 mV, 309 mV, 417 mV, corresponding to NSPC-1000, NSPC-900 and NSPC-800, respectively).



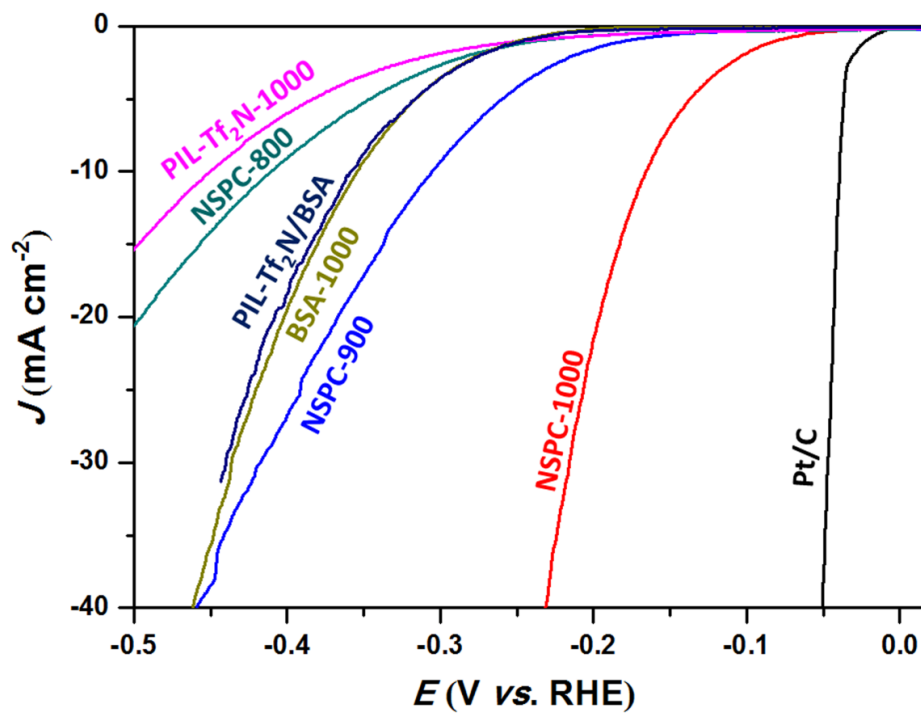

**Figure S11** LSV curves of different carbon materials after iR correction of the data in Figure 4a (for HER test). In the iR-corrected data for HER, NSPC-1000 exhibits a current density of  $10 \text{ mA cm}^{-2}$  at the overpotential of 165 mV in 0.5 M  $\text{H}_2\text{SO}_4$  solution.

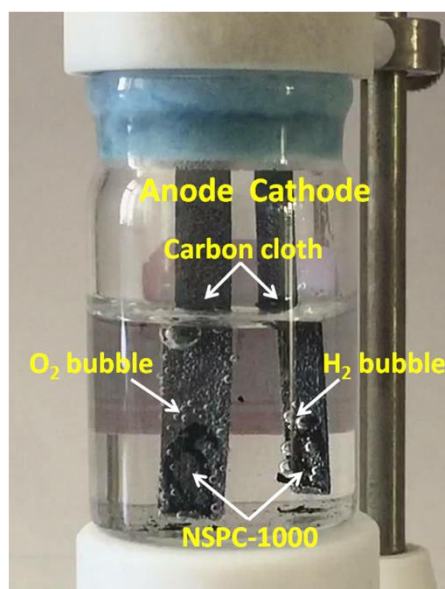

**Figure S12** Photograph of the two-electrode setup showing the generation of hydrogen and oxygen bubbles on CC.

**Table S2** HER performance of NSPC-1000 in this work, in comparison with the results of some representative carbon-based and non-noble electrocatalysts from recent publications.

| Catalyst                                     | Electrolyte                          | Overpotential at $j = 10 \text{ mA cm}^{-2}$ (mV) | Tafel slope (mV dec <sup>-1</sup> ) | Ref. |
|----------------------------------------------|--------------------------------------|---------------------------------------------------|-------------------------------------|------|
| C <sub>3</sub> N <sub>4</sub> /FTO           | 0.1 M PBS                            | 250                                               | /                                   | S2   |
|                                              | 0.1 M KOH                            | 100                                               |                                     |      |
| C <sub>3</sub> N <sub>4</sub> @NG            | 0.5 M H <sub>2</sub> SO <sub>4</sub> | 240                                               | 51.5                                | S3   |
|                                              | 0.1 M KOH                            | >600                                              | /                                   |      |
| g-C <sub>3</sub> N <sub>4</sub> nanoribbon-G | 0.5 M H <sub>2</sub> SO <sub>4</sub> | 207                                               | 54                                  | S4   |
| C <sub>3</sub> N <sub>4</sub>                | 0.1 M PBS                            | 600 (at $j = 0.8 \text{ mA cm}^{-2}$ )            | 120                                 | S5   |
|                                              | 0.1 M KOH                            | 300 (at $j = 0.8 \text{ mA cm}^{-2}$ )            |                                     |      |
| MPSA/GO-1000                                 | 0.5 M H <sub>2</sub> SO <sub>4</sub> | 210 (at $j = 30 \text{ mA cm}^{-2}$ )             | /                                   | S6   |
|                                              | 0.1 M KOH                            | 470                                               | /                                   |      |
| N,P-graphene-1                               | 0.5 M H <sub>2</sub> SO <sub>4</sub> | 420                                               | /                                   | S7   |
|                                              | 0.1 M KOH                            | >600                                              | /                                   |      |
| SNCTs                                        | 0.5 M H <sub>2</sub> SO <sub>4</sub> | 76 (at $j = 0.2 \text{ mA cm}^{-2}$ )             | 126                                 | S8   |
| N,S codoped graphene<br>500C                 | 0.5 M H <sub>2</sub> SO <sub>4</sub> | 276                                               | 81                                  | S9   |
| SHG                                          | 0.1 M KOH                            | 310                                               | 112                                 | S10  |
| N-G                                          | 0.1 M KOH                            | 510                                               | 157                                 | S11  |
| NiMoN <sub>x</sub> /C                        | 0.1 M HClO <sub>4</sub>              | /                                                 | 35.9                                | S12  |
| Co-NRCNTs                                    | 0.5 M H <sub>2</sub> SO <sub>4</sub> | 260                                               | 69                                  | S13  |
|                                              | 0.1 M KOH                            | >400                                              | /                                   |      |
| 1T-MoS <sub>2</sub> nanosheets               | 0.5 M H <sub>2</sub> SO <sub>4</sub> | >200                                              | 41-46                               | S14  |

|                                                |                                      |            |     |             |
|------------------------------------------------|--------------------------------------|------------|-----|-------------|
| Exfoliated WS <sub>2</sub><br>nanosheets       | 0.5 M H <sub>2</sub> SO <sub>4</sub> | 210 mV     | 60  | S15         |
| Exfoliated MoS <sub>2</sub><br>nanosheets      | 0.5 M H <sub>2</sub> SO <sub>4</sub> | 195        | 54  | S16         |
| CoOx@CN                                        | 0.5 M H <sub>2</sub> SO <sub>4</sub> | 232        | 115 | S17         |
| Monolayer MoS <sub>2</sub><br>supported by NPG | 0.5 M H <sub>2</sub> SO <sub>4</sub> | 226        | 46  | S18         |
| NSPC-1000                                      | 0.5 M H <sub>2</sub> SO <sub>4</sub> | <b>172</b> | 44  | <i>This</i> |
|                                                | 1.0 M KOH                            | <b>234</b> | 59  | <i>work</i> |

**Table S3.** Comparison of the HER activity of NSPC-1000 in the present study and leading literature results.

| Entry | Catalyst                                         | Overpotential (mV)      | Tafel slope (mV dec <sup>-1</sup> ) | Electrolyte                          | Reference |
|-------|--------------------------------------------------|-------------------------|-------------------------------------|--------------------------------------|-----------|
| 1     | SA900ZC<br>( <i>S. aureus</i> cell)              | 200                     | 58.4                                | 0.5M H <sub>2</sub> SO <sub>4</sub>  | S19       |
| 2     | HPC-900<br>(Human hair)                          | 100                     | 57.4                                | 0.5M H <sub>2</sub> SO <sub>4</sub>  | S20       |
| 3     | NPCSBF-1000<br>(Chinese steamed bread flour)     | 220                     | 77                                  | 0.5M H <sub>2</sub> SO <sub>4</sub>  | S21       |
| 4     | S/N-CLs<br>( <i>Magnolia liliiflora</i> flowers) | 90<br>(onset potential) | 73                                  | 0.5 M H <sub>2</sub> SO <sub>4</sub> | S22       |
| 5     | CS-900<br>silk cocoon                            | 317                     | 173                                 | 0.5M H <sub>2</sub> SO <sub>4</sub>  | S23       |
| 6     | MoS <sub>2</sub> /SNCF<br>Silk cocoon            | 102                     | 60                                  | 0.5M H <sub>2</sub> SO <sub>4</sub>  | S24       |
| 7     | MoP/CF<br>sodium alginate                        | <200                    | 56.4                                | 0.5 M H <sub>2</sub> SO <sub>4</sub> | S25       |
| 8     | MoS <sub>2</sub> /AC<br>(Glucose)                | 80<br>(onset potential) | 40                                  | 0.5 M H <sub>2</sub> SO <sub>4</sub> | S26       |
| 9     | NSPC-1000                                        | 172                     | 44.3                                | 0.5 M H <sub>2</sub> SO <sub>4</sub> | This work |
|       |                                                  | 234                     | 58.9                                | 1.0 M KOH                            |           |

**Table S4** OER performance of NSPC-1000 in this work, in comparison with the results of some representative carbon-based electrocatalysts from recent publications.

| Catalyst                                          | Electrolyte | Overpotential at $j = 10 \text{ mA cm}^{-2}$ (V) | Tafel slope (mV dec <sup>-1</sup> ) | Ref.      |
|---------------------------------------------------|-------------|--------------------------------------------------|-------------------------------------|-----------|
| SHG                                               | 0.1 M KOH   | 1.60                                             | 71                                  | S10       |
| N-doping graphite                                 | 0.1 M KOH   | 1.61                                             | /                                   | S27       |
| Oxidized carbon cloth                             | 0.1 M KOH   | 1.72                                             | 82                                  | S28       |
| N, P-codoped graphene/<br>carbon nanosheets       | 0.1 M KOH   | 1.57                                             | 70                                  | S29       |
| N,O-codoped carbon<br>hydrogen film               | 0.1 M KOH   | 1.63                                             | 141                                 | S30       |
| N, S-codoped G                                    | 0.1 M KOH   | 1.65                                             | 59                                  | S31       |
| N,O,P-tridoped porous<br>carbon                   | 1.0 M KOH   | 1.63                                             | 84                                  | S32       |
| N-doped G/CNTs hybrids                            | 0.1 M KOH   | 1.63                                             | 83                                  | S33       |
| TCCN                                              | 0.1 M KOH   | 1.65                                             | 74.6                                | S34       |
| MnxOy/NC, CoxOy/NC                                | 0.1 M KOH   | 1.64–1.68                                        | /                                   | S35       |
| N, O dual-doped carbon                            | 0.1 M KOH   | 1.70                                             | 141                                 | S36       |
| Mn <sub>3</sub> O <sub>4</sub> /CoSe <sub>2</sub> | 0.1 M KOH   | 1.68                                             | 49                                  | S37       |
| NiCo <sub>2</sub> O <sub>4</sub> -graphene        | 0.1 M KOH   | 1.69                                             | 156                                 | S38       |
| g-C <sub>3</sub> N <sub>4</sub> -graphene film    | 0.1 M KOH   | 1.65                                             | 128                                 | S39       |
| NSPC-1000                                         | 0.1 M KOH   | 1.69 (on GCE)<br>1.59 (on CC)                    | 88<br>70                            | This work |

**Table S5.** Comparison of capacitance performance of NSPC-1000 in the present study and leading literature results.

| Entry | Material  | Specific capacitance    | Density of Current    | Electrolyte                         | Reference |
|-------|-----------|-------------------------|-----------------------|-------------------------------------|-----------|
| 1     | GA650     | 272 F/g                 | 1 A/g                 | 1 M H <sub>2</sub> SO <sub>4</sub>  | S40       |
| 2     | HPC-650   | 312 F/g                 | 1 A/g                 | 1 M H <sub>2</sub> SO <sub>4</sub>  | S41       |
| 3     | PHC-4     | 476 F cm <sup>-3</sup>  | 1mV s <sup>-1</sup>   | 6 M KOH                             | S42       |
| 4     | SSC       | 669 mF cm <sup>-2</sup> | 1 mA cm <sup>-2</sup> | 6 M KOH                             | S43       |
| 5     | N-HC-800  | 275 F g <sup>-1</sup>   | 0.2 A/g               | 6 M KOH                             | R44       |
| 6     | T-N-PC    | 411 F g <sup>-1</sup>   | 1 A/g                 | 1 M Na <sub>2</sub> SO <sub>4</sub> | S45       |
| 7     | HCPC-800  | 217 F g <sup>-1</sup>   | 5 mV s <sup>-1</sup>  | 6 M KOH                             | S46       |
| 8     | WB-PC-700 | 413 F g <sup>-1</sup>   | 1 A/g                 | 6 M KOH                             | S47       |
| 9     | NPCs      | 465 Fg <sup>-1</sup>    | 1 A/g                 | 0.1 KOH                             | S48       |
| 10    | NSPC-1000 | 495 Fg <sup>-1</sup>    | 0.1 A/g               | 1 M H <sub>2</sub> SO <sub>4</sub>  | This work |

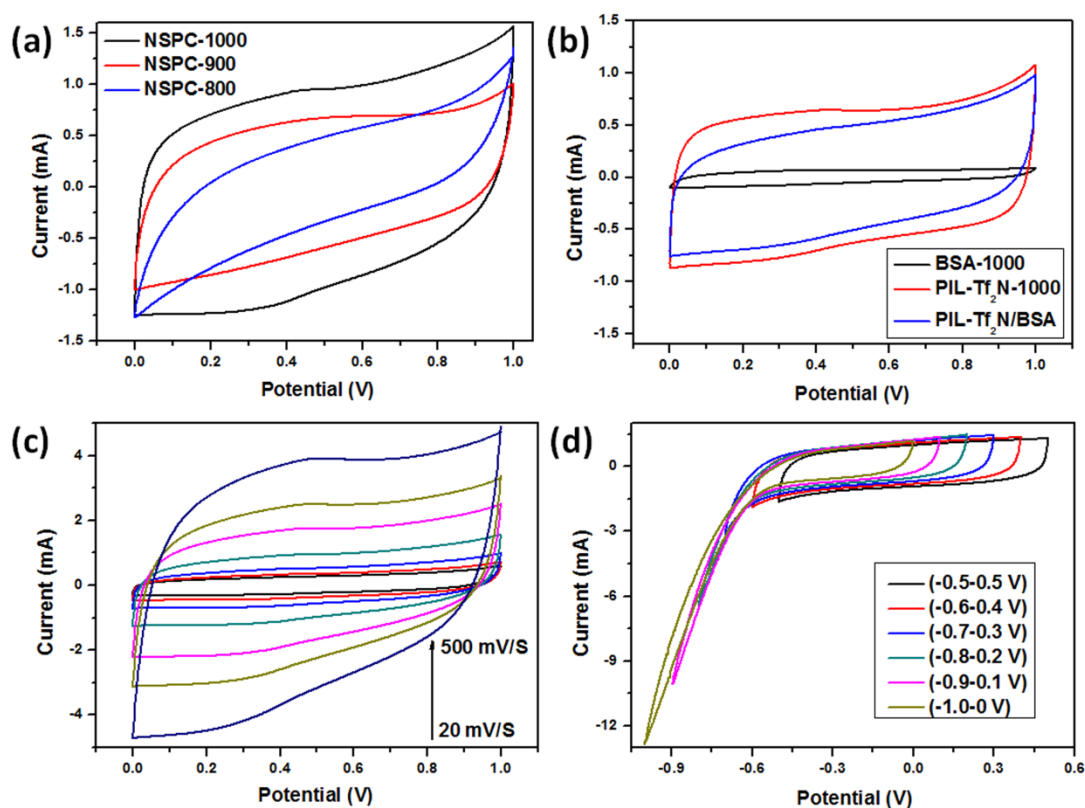

**Figure S13** Electrochemical performances of carbon electrode materials. (a) Cyclic voltammetry (CV) profiles of NSPCs; (b) CV profiles of BSA-1000 and PIL-Tf<sub>2</sub>N-1000 and PIL-Tf<sub>2</sub>N/BSA (it was prepared by mixing PIL-Tf<sub>2</sub>N-1000 and BSA-1000 (7:1, w/w)); (c) CV curves of NSPC-1000 at different scan rates; (d) CV curves of NSPC-1000 in different potential windows, scan rate 100 mV s<sup>-1</sup>. All the measurements were conducted in 0.5 M H<sub>2</sub>SO<sub>4</sub> electrolyte.

Supporting information, Video

Video S1: HER using NSPC-1000 loaded carbon cloth as both anode and cathode.

This movie shows the H<sub>2</sub> and O<sub>2</sub> evolution on NSPC-1000 loaded carbon cloth electrodes in the electrochemical cell at an applied potential from 0.1 to -0.7 V. (electrolyte: 0.5 M H<sub>2</sub>SO<sub>4</sub>; NSPC-1000 loading: 0.25 mg cm<sup>-2</sup>)

## Reference

- [S1] J. Yuan, C. Giordano and M. Antonietti, *Chem. Mater.*, 2010, **22**, 5003.
- [S2] M. Shalom, S. Gimenez, F. Schipper, I. Herraiz-Cardona, J. Bisquert and M. Antonietti, *Angew. Chem. Int. Ed.*, 2014, **53**, 3654.
- [S3] Y. Zheng, Y. Jiao, Y. Zhu, L. H. Li, Y. Han, Y. Chen, A. Du, Mietek Jaroniec and Shi Zhang Qiao, *Nat. Commun.*, 2014, **5**, 3783.
- [S4] Y. Zhao, F. Zhao, X. Wang, C. Xu, Z. Zhang, G. Shi and L. Qu, *Angew. Chem. Int. Ed.*, 2014, **53**, 13934.
- [S5] M. Shalom, S. Gimenez, F. Schipper, I. Herraiz-Cardona, J. Bisquert and M. Antonietti, *Angew. Chem. Int. Ed.*, 2014, **126**, 3728.
- [S6] J. Zhang, L. Qu, G. Shi, J. Liu, J. Chen and L. Dai, *Angew. Chem. Int. Ed.*, 2016, **55**, 2230.
- [S7] Y. Zheng, Y. Jiao, L. H. Li, T. Xing, Y. Chen, M. Jaroniec and S. Z. Qiao, *ACS Nano.*, 2014, **8**, 5290.
- [S8] T. Sun, Q. Wu, Y. Jiang, Z. Zhang, L. Du, L. Yang, X. Wang and Z. Hu, *Chem. Eur. J.*, 2016, **22**, 10326.
- [S9] Y. Ito, W. Cong, T. Fujita, Z. Tang and M. Chen, *Angew. Chem. Int. Ed.*, 2015, **54**, 2131.
- [S10] C. Hu and L. Dai, *Adv. Mater.*, 2017, DOI: 10.1002/adma.201604942.
- [S11] J. M. Ge, B. Zhang, L. B. Lv, H. H. Wang, T. N. Ye, X. Wei, J. Su, K. X. Wang, X. H. Lin and J. S. Chen, *Nano Energy*, 2015, **15**, 567.
- [S12] W.F. Chen, K. Sasaki, C. Ma, A. I. Frenkel, N. Marinkovic, J. T. Muckerman, Y. Zhu and R. R. Adzic, *Angew. Chem. Int. Ed.*, 2012, **51**, 6131.
- [S13] X. Zou, X. Huang, A. Goswami, R. Silva, B. R. Sathe, E. Mikmekova and T. Asefa, *Angew. Chem. Int. Ed.*, 2014, **53**, 4372.
- [S14] D. Voiry, M. Salehi, R. Silva, T. Fujita, M. Chen, T. Asefa, V. B. Shenoy, Goki Eda and M. Chhowalla, *Nano Lett.*, 2013, **13**, 6222.
- [S15] D. Voiry, H. Yamaguchi, J. Li, R. Silva, D. C. B. Alves, Takeshi Fujita, M. Chen, T. Asefa, V. B. Shenoy, G. Eda and M. Chhowalla, *Nat. Mater.*, 2013, **12**, 850.
- [S16] M.A. Lukowski, A.S. Daniel, F. Meng, A. Forticaux, L. Li and S. Jin, *J. Am. Chem. Soc.*, 2013, **135**, 10274.
- [S17] H. Jin, J. Wang, D. Su, Z. Wei, Z. Pang and Y. Wang, *J. Am. Chem. Soc.*, 2015, **137**, 2688.

- [S18] Y. Tan, P. Liu, L. Chen, W. Cong, Y. Ito, J. Han, X. Guo, Z. Tang, T. Fujita, A. Hirata and M. W. Chen, *Adv. Mater.*, 2014, **26**, 8023.
- [S19] L. Wei, H. E. Karahan, K. Goh, W. Jiang, D. Yu, O. Birer, R. Jiang and Y. Chen, *J. Mater. Chem. A*, 2015, **3**, 7210.
- [S20] X. Liu, W. Zhou, L. Yang, L. Li, Z. Zhang, Y. Ke and S. Chen, *J. Mater. Chem. A*, 2015, **3**, 8840.
- [S21] A. Nsabimana, F. Wu, J. Lai, Z. Liu, R. Luque and G. Xu, *Electrochim. Acta*, 2018, **290**, 30.
- [S22] R. Atchudan, T. N. J. I. Edison, S. Perumal, A. S. Parveen and Y. R. Lee, *J. Electroanal. Chem.*, 2019, **833**, 357.
- [S23] X. Liu, M. Zhang, D. Yu, T. Li, M. Wan, H. Zhu, M. Du and J. Yao, *Electrochim. Acta*, 2016, **215**, 223.
- [S24] Q. F. Wang, R. P. Yanzhang, X. N. Ren, H. Zhu, M. Zhang and M. L. Du, *Int. J. Hydrogen Energy*, 2016, **41**, 21870.
- [S25] W. Cui, Q. Liu, Z. Xing, A. M. Asiri, K. A. Alamry and X. Sun, *Appl. Catal. B Environ.*, 2015, **164**, 144.
- [S26] X. Zhao, H. Zhu and X. Yang, *Nanoscale*, 2014, **6**, 10680.
- [S27] Y. Zhao, R. H. Nakamura, K. Kamiya, S. J. Nakanishi and K. Hashimoto, *Nat. Comm.*, 2013, **4**, 2390.
- [S28] N. Y. Cheng, Q. Liu, J. Q. Tian, Y. R. Xue, A. M. Asiri, H. F. Jiang, Y. Q. Hee and X. P. Sun, *Chem. Comm.*, 2015, **51**, 1616.
- [S29] R. Li, Z. D. Wei and X. L. Gou, *ACS Catal.*, 2015, **5**, 4133.
- [S30] S. Chen, J. J. Duan, M. Jaroniec and S. Z. Qiao, *Adv. Mater.*, 2014, **26**, 2925.
- [S31] K. G. Qu, Y. Zheng, S. Dai and S. Z. Qiao, *Nano Energy*, 2016, **19**, 373.
- [S32] J. P. Lai, S. P. Li, F. X. Wu, M. Saqib, R. Luque and G. B. Xu, *Energy Environ. Sci.*, 2016, **9**, 1210.
- [S33] G. L. Tian, M. Q. Zhao, D. S. Yu, X. Y. Kong, J. Q. Huang, Q. Zhang and F. Wei, *Small*, 2014, **10**, 2251.
- [S34] T. Y. Ma, J. L. Cao, M. Jaroniec and S. Z. Qiao, *Angew. Chem. Int. Ed.*, 2016, **55**, 1138.
- [S35] J. Masa, W. Xia, I. Sinev, A. Zhao, Z. Sun, S. Gruzke, P. Weide, M. Muhler and W. Schuhmann, *Angew. Chem. Int. Ed.*, 2014, **53**, 8508.
- [S36] S. Chen, J. J. Duan, M. Jaroniec and S. Z. Qiao, *Adv. Mater.*, 2014, **26**, 2925.



- [S37] M. R. Gao, Y. F. Xu, J. Jiang, Y. R. Zheng and S. H. Yu, *J. Am. Chem. Soc.*, 2012, **134**, 2930.
- [S38] S. Chen and S. Z. Qiao, *ACS Nano*, 2013, **7**, 10190.
- [S39] S. Chen, J. J. Duan, J. Ran and S. Z. Qiao, *Adv. Sci.*, 2015, **2**, 1400015.
- [S40] L. L. Zhang, H. H. Li, Y. H. Shi, C. Y. Fan, X. L. Wu, H. F. Wang, H. Z. Sun and J. P. Zhang, *ACS Appl. Mater. Interfaces*, 2016, **8**, 4233.
- [S41] Y. Shi, L. Zhang, T. B. Schon, H. Li, C. Fan, X. Li, H. Wang, X. Wu, H. Xie, H. Sun, D. S. Seferos and J. Zhang, *ACS Appl. Mater. Interfaces*, 2017, **9**, 42699.
- [S42] X. Liu, C. Ma, J. Li, B. Zielinska, R. J. Kalenczuk, X. Chen, P. K. Chu, T. Tang, E. Mijowska, *J. Power Sources*, 2019, **412**, 1.
- [S43] Y. Zhang, H. Jiang, Q. Wang, J. Zheng, C. Meng, *Applied Surface Science*, 2018, **447**, 876.
- [S44] Wei Liu, Jie Mei, Guolong Liu, Qian Kou, Tingfeng Yi, and Saijun Xiao, *ACS Sustainable Chem. Eng.*, 2018, **6**, 11595.
- [S45] Y. Ding, L. Mo, C. Gao, X. Liu, T. Yu, W. Chen, S. Chen, Z. Li and L. Hu, *ACS Sustainable Chem. Eng.*, 2018, **6**, 9822.
- [S46] L. Peng, Y. Cai, Y. Luo, G. Yuan, J. Huang, C. Hu, H. Dong, Y. Xiao, Y. Liang, Y. Liu and M. Zheng, *ACS Sustainable Chem. Eng.*, 2018, **6**, 12716.
- [S47] P. Yu, Y. Liang, H. Dong, H. Hu, S. Liu, L. Peng, M. Zheng, Y. Xiao, and Y. Liu, *ACS Sustainable Chem. Eng.*, 2018, **6**, 15325.
- [S48] G. Ren, Y. Li, Q. Chen, Y. Qian, J. Zheng, Y. Zhu and C. Teng, *ACS Sustainable Chem. Eng.*, 2018, **6**, 16032.
